# Supplementary material for: The Src family kinase inhibitor dasatinib delays pain-related behaviour and conserves bone in a rat model of cancer-induced bone pain
Source: PubMed Central journal article supplement (PMC5500481; doi:10.1038/s41598-017-05029-1), 2017-07-06

**The Src family kinase inhibitor dasatinib delays pain-related behaviour and conserves bone in a rat model of cancer-induced bone pain**

Camilla Kristine Appel<sup>1</sup>, Simone Gallego-Pedersen<sup>1</sup>, Line Andersen<sup>1</sup>, Sophie Blancheflor Kristensen<sup>1</sup>, Ming Ding<sup>2</sup>, Sarah Falk<sup>1</sup>, Manasi Sayilekshmy<sup>1</sup>, Charlotte Gabel-Jensen<sup>3</sup>, Anne-Marie Heegaard<sup>1\*</sup>.

<sup>1</sup>University of Copenhagen, Faculty of Health and Medical Sciences, Department of Drug Design and Pharmacology, Copenhagen, 2100, Denmark.

<sup>2</sup>Odense University Hospital, University of Southern Denmark, Institute of Clinical Research, Department of Orthopaedics and Traumatology, Odense, 5320, Denmark

<sup>3</sup>University of Copenhagen, Faculty of Health and Medical Sciences, Department of Pharmacy, Copenhagen, 2100, Denmark

\*amhe@sund.ku.dk

Supplementary information

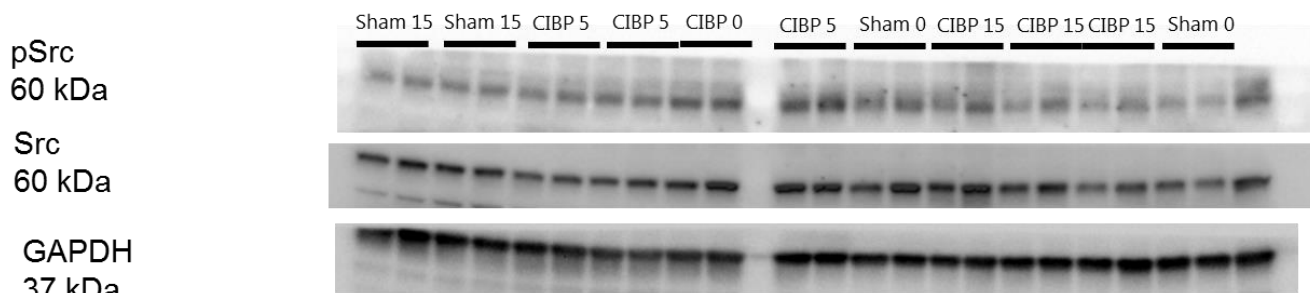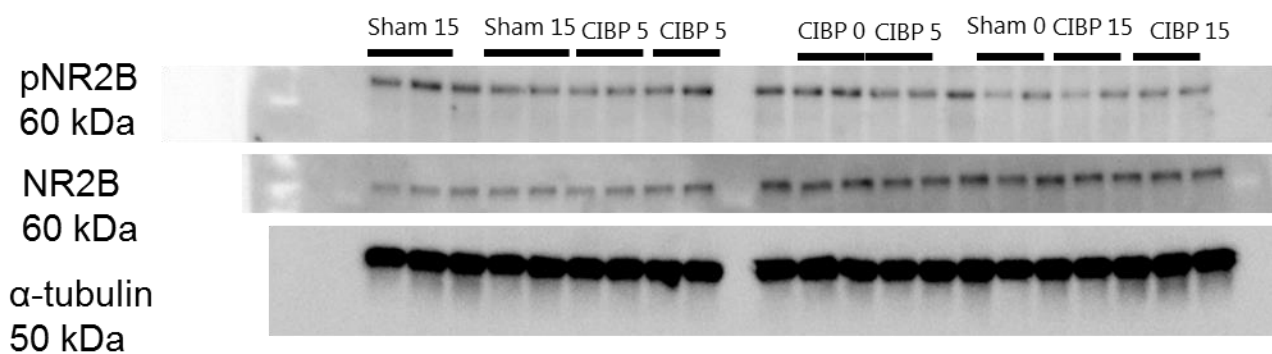

Supplement: 41598_2017_5029_MOESM1_ESM.pdf [file 41598_2017_5029_MOESM1_ESM.pdf]
